# Supplementary material for: Behandlung retroperitonealer Sarkome in Deutschland
Source: Springer Nature journal article supplement (doi:10.1007/s00104-017-0504-2), 2017-09-13
Supplement: MOESM1 [file 15056172]

| Diagnostik                                                                                                     | Bis 5 Patienten im Jahr |     | 6 bis 10 Patienten im Jahr |      | Mehr als 10 Patienten im Jahr |      | Alle Teilnehmer |     |
|----------------------------------------------------------------------------------------------------------------|-------------------------|-----|----------------------------|------|-------------------------------|------|-----------------|-----|
| <b>Frage 1: Welche abdominelle Bildgebung wird bei Ihnen regelhaft durchgeführt? (Mehrfachnennung möglich)</b> |                         |     |                            |      |                               |      |                 |     |
| a) MRT                                                                                                         | 17                      | 17% | 2                          | 10%  | 6                             | 55%  | 25              | 19% |
| b) CT                                                                                                          | 29                      | 28% | 5                          | 24%  | 3                             | 27%  | 37              | 28% |
| c) MRT und CT                                                                                                  | 73                      | 72% | 16                         | 76%  | 6                             | 55%  | 95              | 71% |
| d) PET/CT                                                                                                      | 17                      | 17% | 3                          | 14%  | 2                             | 18%  | 22              | 16% |
| e) Sonstiges                                                                                                   | 13                      | 13% | 2                          | 10%  | 0                             | 0%   | 15              | 11% |
| Antworten gesamt                                                                                               | 149                     |     | 28                         |      | 17                            |      | 194             |     |
| <b>Frage 2: Welche thorakale Bildgebung wird von Ihnen regelhaft durchgeführt? (Mehrfachnennung möglich)</b>   |                         |     |                            |      |                               |      |                 |     |
| a) Röntgen                                                                                                     | 49                      | 48% | 5                          | 24%  | 3                             | 27%  | 57              | 43% |
| b) CT                                                                                                          | 98                      | 96% | 20                         | 95%  | 10                            | 91%  | 128             | 96% |
| c) Keine                                                                                                       | 0                       | 0%  | 0                          | 0%   | 0                             | 0%   | 0               | 0%  |
| d) Sonstiges                                                                                                   | 6                       | 6%  | 0                          | 0%   | 0                             | 0%   | 6               | 4%  |
| Antworten gesamt                                                                                               | 153                     |     | 25                         |      | 13                            |      | 191             |     |
| <b>Frage 3: Wird bei Ihnen regelhaft vor Therapiebeginn eine Biopsie des Tumors durchgeführt?</b>              |                         |     |                            |      |                               |      |                 |     |
| a) Ja                                                                                                          | 53                      | 52% | 10                         | 48%  | 10                            | 91%  | 73              | 54% |
| b) Nein                                                                                                        | 49                      | 48% | 11                         | 52%  | 1                             | 9%   | 61              | 46% |
| Antworten gesamt                                                                                               | 102                     |     | 21                         |      | 11                            |      | 134             |     |
| <b>Frage 4: Wenn eine Biopsie durchgeführt wird, welche Technik wird dabei verwendet?</b>                      |                         |     |                            |      |                               |      |                 |     |
| a) Chirurgische Inzisionsbiopsie                                                                               | 41                      | 43% | 7                          | 33%  | 2                             | 18%  | 50              | 37% |
| b) Stanzbiopsie                                                                                                | 53                      | 55% | 13                         | 62%  | 9                             | 82%  | 75              | 56% |
| c) Zytologie                                                                                                   | 2                       | 2%  | 1                          | 5%   | 0                             | 0%   | 3               | 2%  |
| Antworten gesamt                                                                                               | 96                      |     | 21                         |      | 11                            |      | 128             |     |
| <b>Frage 5: Werden Patienten mit retroperitonealen Tumoren regelhaft in einem Tumorboard besprochen?</b>       |                         |     |                            |      |                               |      |                 |     |
| a) Ja                                                                                                          | 100                     | 98% | 21                         | 100% | 11                            | 100% | 132             | 99% |
| b) Nein                                                                                                        | 2                       | 2%  | 0                          | 0%   | 0                             | 0%   | 2               | 1%  |
| Antworten gesamt                                                                                               | 102                     |     | 21                         |      | 11                            |      | 134             |     |
| <b>Frage 6: Handelt es sich dabei um ein spezielles Sarkomboard?</b>                                           |                         |     |                            |      |                               |      |                 |     |
| a) Ja                                                                                                          | 13                      | 13% | 5                          | 24%  | 7                             | 64%  | 25              | 19% |
| b) Nein                                                                                                        | 89                      | 87% | 16                         | 76%  | 4                             | 36%  | 109             | 81% |
| Antworten gesamt                                                                                               | 102                     |     | 21                         |      | 11                            |      | 134             |     |

| Operation                                                                                     | Bis 5 Patienten im Jahr |     | 6 bis 10 Patienten im Jahr |     | Mehr als 10 Patienten im Jahr |      | Alle Teilnehmer |      |
|-----------------------------------------------------------------------------------------------|-------------------------|-----|----------------------------|-----|-------------------------------|------|-----------------|------|
| <b>Frage 7: Welche Schnittführung bevorzugen Sie zur Resektion retroperitonealer Sarkome?</b> |                         |     |                            |     |                               |      |                 |      |
| a) Mediane Laparotomie                                                                        | 90                      | 88% | 20                         | 95% | 11                            | 100% | 121             | 90%  |
| b) Quere Laparotomie                                                                          | 6                       | 6%  | 1                          | 5%  | 0                             | 0%   | 7               | 5%   |
| c) Retroperitonealer Zugang                                                                   | 6                       | 6%  | 0                          | 0%  | 0                             | 0%   | 6               | 4%   |
| Antworten gesamt                                                                              | 102                     |     | 21                         |     | 11                            |      | 134             |      |
| <b>Frage 8: Welche Operationsstrategie wählen Sie üblicherweise?</b>                          |                         |     |                            |     |                               |      |                 |      |
| a) Eukleation                                                                                 | 2                       | 2%  | 1                          | 5%  | 0                             | 0%   |                 |      |
| b) Marginale Resektion                                                                        | 13                      | 13% | 3                          | 14% | 1                             | 9%   | 17              | 13%  |
| c) Abdominelle Kompartimentresektion                                                          | 87                      | 85% | 17                         | 81% | 10                            | 91%  | 114             | 85%  |
| Antworten gesamt                                                                              | 102                     |     | 21                         |     | 11                            |      | 134             | 100% |
| <b>Frage 9: Führen Sie regelhaft eine systematische Lymphadenektomie durch?</b>               |                         |     |                            |     |                               |      |                 |      |
| a) Ja                                                                                         | 42                      | 41% | 10                         | 48% | 2                             | 18%  | 54              | 40%  |
| b) Nein                                                                                       | 60                      | 59% | 11                         | 52% | 9                             | 82%  | 80              | 60%  |
| Antworten gesamt                                                                              | 102                     |     | 21                         |     | 11                            |      | 134             |      |
| <b>Frage 10: Wann erfolgt üblicherweise eine Resektion von Nachbarorganen?</b>                |                         |     |                            |     |                               |      |                 |      |
| a) Nur bei eindeutiger Infiltration                                                           | 37                      | 36% | 3                          | 14% | 0                             | 0%   | 40              | 30%  |
| b) Auch bei Adhärenz                                                                          | 65                      | 64% | 18                         | 86% | 11                            | 100% | 94              | 70%  |
| Antworten gesamt                                                                              | 102                     |     | 21                         |     | 11                            |      | 134             |      |

| Operation                                                                                                                                                               | Bis 5 Patienten im Jahr |     | 6 bis 10 Patienten im Jahr |     | Mehr als 10 Patienten im Jahr |      | Alle Teilnehmer |      |
|-------------------------------------------------------------------------------------------------------------------------------------------------------------------------|-------------------------|-----|----------------------------|-----|-------------------------------|------|-----------------|------|
| <b>Frage 11: Wieviele Nachbarorgane werden hierbei durchschnittlich reseziert?</b>                                                                                      |                         |     |                            |     |                               |      |                 |      |
| a) 0                                                                                                                                                                    | 5                       | 5%  | 0                          | 0%  | 0                             | 0%   | 5               | 4%   |
| b) 1                                                                                                                                                                    | 36                      | 35% | 3                          | 14% | 1                             | 9%   | 40              | 30%  |
| c) 2                                                                                                                                                                    | 42                      | 41% | 7                          | 33% | 5                             | 45%  | 54              | 40%  |
| d) >2                                                                                                                                                                   | 19                      | 19% | 11                         | 52% | 5                             | 45%  | 35              | 26%  |
| Antworten gesamt                                                                                                                                                        | 102                     |     | 21                         |     | 11                            |      | 134             |      |
| <b>Frage 12: Was sind nach Ihrer Meinung Kriterien der Irresektabilität?</b>                                                                                            |                         |     |                            |     |                               |      |                 |      |
| a) Tumorgröße über 20cm<br>Infiltration von mehr als zwei Organen (z.B.                                                                                                 | 1                       | 1%  | 0                          | 0%  | 0                             | 0%   | 1               | 1%   |
| b) Niere, Kolon und Pankreas)<br>Infiltration von Duodenum oder                                                                                                         | 7                       | 7%  | 0                          | 0%  | 0                             | 0%   | 7               | 5%   |
| c) Pankreaskopf                                                                                                                                                         | 6                       | 6%  | 0                          | 0%  | 0                             | 0%   | 6               | 4%   |
| d) Infiltration der Mesenterialwurzel                                                                                                                                   | 79                      | 77% | 14                         | 67% | 6                             | 55%  | 99              | 74%  |
| e) Infiltration der Leber                                                                                                                                               | 4                       | 4%  | 0                          | 0%  | 0                             | 0%   | 4               | 3%   |
| f) Notwendigkeit der Resektion und<br>Rekonstruktion der Vena cava                                                                                                      | 14                      | 14% | 0                          | 0%  | 0                             | 0%   | 14              | 10%  |
| g) Notwendigkeit der Resektion und<br>Rekonstruktion der Aorta                                                                                                          | 27                      | 26% | 1                          | 5%  | 0                             | 0%   | 28              | 21%  |
| h) Infiltration der paravertebralen Muskulatur<br>oder von Neuroforamina                                                                                                | 55                      | 54% | 6                          | 29% | 4                             | 36%  | 65              | 49%  |
| i) Keine der genannten                                                                                                                                                  | 11                      | 11% | 4                          | 19% | 3                             | 27%  | 18              | 13%  |
| j) Weitere Kriterien                                                                                                                                                    | 5                       | 5%  | 3                          | 14% | 1                             | 9%   | 9               | 7%   |
| Antworten gesamt                                                                                                                                                        | 209                     |     | 28                         |     | 14                            |      | 251             | 187% |
| <b>Frage 13: Würden Sie eine Tumorresektion bei Vorliegen einer einzelnen Lungenmetastase durchführen?</b>                                                              |                         |     |                            |     |                               |      |                 |      |
| a) Regelhaft                                                                                                                                                            | 73                      | 72% | 15                         | 71% | 11                            | 100% | 99              | 74%  |
| b) Selten                                                                                                                                                               | 26                      | 25% | 6                          | 29% | 0                             | 0%   | 32              | 24%  |
| c) Nie                                                                                                                                                                  | 3                       | 3%  | 0                          | 0%  | 0                             | 0%   | 3               | 2%   |
| Antworten gesamt                                                                                                                                                        | 102                     |     | 21                         |     | 11                            |      |                 |      |
| <b>Frage 14: Wie hoch schätzen Sie die Häufigkeit von Komplikationen ein, die eine erneute Operation oder Intervention (z.B. Abszessdrainage) erforderlich machen?</b>  |                         |     |                            |     |                               |      |                 |      |
| a) 0-5%                                                                                                                                                                 | 45                      | 45% | 4                          | 19% | 4                             | 36%  | 53              | 40%  |
| b) 6-10%                                                                                                                                                                | 37                      | 37% | 12                         | 57% | 7                             | 64%  | 56              | 42%  |
| c) 11-20%                                                                                                                                                               | 15                      | 15% | 4                          | 19% | 0                             | 0%   | 19              | 14%  |
| d) 21-30%                                                                                                                                                               | 3                       | 3%  | 1                          | 5%  | 0                             | 0%   | 4               | 3%   |
| e) >30%                                                                                                                                                                 | 1                       | 1%  | 0                          | 0%  | 0                             | 0%   | 1               | 1%   |
| Antworten gesamt                                                                                                                                                        | 101                     |     | 21                         |     | 11                            |      | 133             |      |
| <b>Frage 15: Wie hoch schätzen Sie die postoperative Mortalität nach Resektion eines retroperitonealen Sarkoms in Ihrer Klinik ein?</b>                                 |                         |     |                            |     |                               |      |                 |      |
| a) 0                                                                                                                                                                    | 19                      | 19% | 4                          | 19% | 2                             | 18%  | 25              | 19%  |
| b) 1-2%                                                                                                                                                                 | 64                      | 63% | 11                         | 52% | 9                             | 82%  | 84              | 63%  |
| c) 3-5%                                                                                                                                                                 | 11                      | 11% | 6                          | 29% | 0                             | 0%   | 17              | 13%  |
| d) 6-10%                                                                                                                                                                | 5                       | 5%  | 0                          | 0%  | 0                             | 0%   | 5               | 4%   |
| e) >10%                                                                                                                                                                 | 2                       | 2%  | 0                          | 0%  | 0                             | 0%   | 2               | 2%   |
| Antworten gesamt                                                                                                                                                        | 101                     |     | 21                         |     | 11                            |      | 133             |      |
| <b>Frage 16: Wie hoch ist annäherungsweise der Anteil von Patienten, bei denen eine vollständige Resektion nicht möglich ist und Sie eine R2 Resektion durchführen?</b> |                         |     |                            |     |                               |      |                 |      |
| a) 0-1%                                                                                                                                                                 | 24                      | 25% | 4                          | 20% | 2                             | 20%  | 30              | 24%  |
| b) 1-2%                                                                                                                                                                 | 20                      | 21% | 4                          | 20% | 5                             | 50%  | 29              | 23%  |
| c) 3-5%                                                                                                                                                                 | 44                      | 45% | 8                          | 40% | 2                             | 20%  | 54              | 43%  |
| d) 6-10%                                                                                                                                                                | 9                       | 9%  | 4                          | 20% | 1                             | 10%  | 14              | 11%  |
| Antworten gesamt                                                                                                                                                        | 97                      |     | 20                         |     | 10                            |      | 127             |      |

| Multimodale Therapie                                                                                                          | Bis 5 Patienten im Jahr |     | 6 bis 10 Patienten im Jahr |     | Mehr als 10 Patienten im Jahr |     | Alle Teilnehmer |     |
|-------------------------------------------------------------------------------------------------------------------------------|-------------------------|-----|----------------------------|-----|-------------------------------|-----|-----------------|-----|
| <b>Frage 17: Wie häufig wird bei Ihnen eine zusätzliche Strahlentherapie durchgeführt?</b>                                    |                         |     |                            |     |                               |     |                 |     |
| a) <10%                                                                                                                       | 34                      | 34% | 2                          | 10% | 2                             | 18% | 38              | 29% |
| b) 10-50%                                                                                                                     | 43                      | 43% | 12                         | 57% | 3                             | 27% | 58              | 44% |
| c) 51-90%                                                                                                                     | 15                      | 15% | 6                          | 29% | 6                             | 55% | 27              | 20% |
| d) >90%                                                                                                                       | 8                       | 8%  | 1                          | 5%  | 0                             | 0%  | 9               | 7%  |
| Antworten gesamt                                                                                                              | 100                     |     | 21                         |     | 11                            |     | 132             |     |
| <b>Frage 18: Wenn eine Bestrahlung angewendet wird, wann wird diese üblicherweise durchgeführt? (Mehrfachnennung möglich)</b> |                         |     |                            |     |                               |     |                 |     |
| a) Präoperativ                                                                                                                | 24                      | 24% | 11                         | 52% | 6                             | 55% | 41              | 31% |
| b) Postoperativ                                                                                                               | 90                      | 88% | 17                         | 81% | 8                             | 73% | 115             | 86% |
| c) Intraoperativ                                                                                                              | 4                       | 4%  | 2                          | 10% | 2                             | 18% | 8               | 6%  |
| Antworten gesamt                                                                                                              | 118                     |     | 30                         |     | 16                            |     | 164             |     |
| <b>Frage 19: Wie häufig wird bei Ihnen eine zusätzliche Chemotherapie durchgeführt?</b>                                       |                         |     |                            |     |                               |     |                 |     |
| a) <10%                                                                                                                       | 34                      | 34% | 2                          | 10% | 4                             | 36% | 40              | 30% |
| b) 10-50%                                                                                                                     | 46                      | 46% | 13                         | 62% | 4                             | 36% | 63              | 48% |
| c) 51-90%                                                                                                                     | 18                      | 18% | 4                          | 19% | 3                             | 27% | 25              | 19% |
| d) >90%                                                                                                                       | 2                       | 2%  | 2                          | 10% | 0                             | 0%  | 4               | 3%  |
| Antworten gesamt                                                                                                              | 100                     |     | 21                         |     | 11                            |     | 132             |     |
| <b>Frage 20: Wenn eine Chemotherapie indiziert wird, wann wird diese üblicherweise durchgeführt?</b>                          |                         |     |                            |     |                               |     |                 |     |
| a) Präoperativ                                                                                                                | 5                       | 5%  | 4                          | 19% | 5                             | 45% | 14              | 11% |
| b) Postoperativ                                                                                                               | 67                      | 66% | 9                          | 43% | 3                             | 27% | 79              | 59% |
| c) Prä- und Postoperativ                                                                                                      | 29                      | 29% | 8                          | 38% | 3                             | 27% | 40              | 30% |
| Antworten gesamt                                                                                                              | 101                     |     | 21                         |     | 11                            |     | 133             |     |

| Allgemeine Fragen                                                                                                         | Bis 5 Patienten im Jahr |     | 6 bis 10 Patienten im Jahr |     | Mehr als 10 Patienten im Jahr |     | Alle Teilnehmer |     |
|---------------------------------------------------------------------------------------------------------------------------|-------------------------|-----|----------------------------|-----|-------------------------------|-----|-----------------|-----|
| <b>Frage 21: Wie viele Patienten wurden wegen eines retroperitonealen Sarkoms im letzten Jahr in Ihrem Haus operiert?</b> |                         |     |                            |     |                               |     |                 |     |
| a) Keine, Patienten mit retroperitonealen Sarkomen werden in andere Kliniken verlegt/überwiesen                           | 11                      |     |                            |     |                               |     | 11              | 8%  |
| b) Keine, wir behandeln aber prinzipiell Patienten mit retroperitonealen Sarkomen                                         | 16                      |     |                            |     |                               |     | 16              | 12% |
| c) 1-5 Pat                                                                                                                | 75                      |     |                            |     |                               |     | 75              | 56% |
| d) 6-10 Pat                                                                                                               |                         |     | 21                         |     |                               |     | 21              | 16% |
| e) 11-20 Pat                                                                                                              |                         |     |                            |     | 7                             |     | 7               | 5%  |
| f) >20 Pat                                                                                                                |                         |     |                            |     | 4                             |     | 4               | 3%  |
| Antworten gesamt                                                                                                          | 102                     |     | 21                         |     | 11                            |     | 134             |     |
| <b>Frage 22: Wie hoch schätzen Sie das 5-Jahresüberleben Ihrer Patienten mit retroperitonealen Sarkomen ein?</b>          |                         |     |                            |     |                               |     |                 |     |
| Freie Eingabe in Prozent, hier in Kategorien zusammengefasst.                                                             |                         |     |                            |     |                               |     |                 |     |
| 1-25%                                                                                                                     | 13                      | 13% | 0                          | 0%  | 0                             | 0%  | 13              | 10% |
| 26-50%                                                                                                                    | 22                      | 22% | 6                          | 29% | 3                             | 27% | 31              | 23% |
| 51-75%                                                                                                                    | 44                      | 43% | 11                         | 52% | 4                             | 36% | 59              | 44% |
| 76-100%                                                                                                                   | 18                      | 18% | 2                          | 10% | 3                             | 27% | 23              | 17% |
| keine Angabe                                                                                                              | 5                       | 5%  | 2                          | 10% | 1                             | 9%  | 8               | 6%  |
| Median                                                                                                                    | 52%                     |     | 51%                        |     | 67%                           |     |                 |     |
| <b>Frage 23: Wären Sie bereit, Ihre Patienten in einem prospektiven Register der DGAV/StuDoQ zu dokumentieren?</b>        |                         |     |                            |     |                               |     |                 |     |
| a) Ja                                                                                                                     | 95                      | 94% | 20                         | 95% | 10                            | 91% | 125             | 94% |
| b) Nein                                                                                                                   | 6                       | 6%  | 1                          | 5%  | 1                             | 9%  | 8               | 6%  |
| Antworten gesamt                                                                                                          | 101                     |     | 21                         |     | 11                            |     | 133             |     |

| Allgemeine Fragen                                                                                                                                                  | Bis 5 Patienten im Jahr |     | 6 bis 10 Patienten im Jahr |     | Mehr als 10 Patienten im Jahr |     | Alle Teilnehmer |      |
|--------------------------------------------------------------------------------------------------------------------------------------------------------------------|-------------------------|-----|----------------------------|-----|-------------------------------|-----|-----------------|------|
| <b>Frage 24: Wären Sie an einem Workshop "Therapie retroperitonealer Sarkome" interessiert?</b>                                                                    |                         |     |                            |     |                               |     |                 |      |
| a) Ja                                                                                                                                                              | 83                      | 83% | 18                         | 86% | 10                            | 91% | 111             | 84%  |
| b) Nein                                                                                                                                                            | 17                      | 17% | 3                          | 14% | 1                             | 9%  | 21              | 16%  |
| Antworten gesamt                                                                                                                                                   | 100                     |     | 21                         |     | 11                            |     | 132             |      |
| <b>Frage 25: Wären Sie an der Zusendung von Informationsmaterial für Patienten interessiert?</b>                                                                   |                         |     |                            |     |                               |     |                 |      |
| a) Ja                                                                                                                                                              | 73                      | 73% | 16                         | 76% | 10                            | 91% | 99              | 75%  |
| b) Nein                                                                                                                                                            | 27                      | 27% | 5                          | 24% | 1                             | 9%  | 33              | 25%  |
| Antworten gesamt:                                                                                                                                                  | 100                     |     | 21                         |     | 11                            |     |                 |      |
| <b>Frage 26: Ihre Abteilung befindet sich in</b>                                                                                                                   |                         |     |                            |     |                               |     |                 |      |
| a) einem Universitätsklinikum                                                                                                                                      | 9                       | 9%  | 10                         | 48% | 8                             | 73% | 27              | 20%  |
| b) einem KH der Maximalversorgung                                                                                                                                  | 8                       | 8%  | 5                          | 24% | 2                             | 18% | 15              | 11%  |
| c) einem KH der Schwerpunktversorgung                                                                                                                              | 30                      | 29% | 3                          | 14% | 1                             | 9%  | 34              | 26%  |
| d) einem KH der Regelversorgung                                                                                                                                    | 55                      | 54% | 3                          | 14% | 0                             | 0%  | 58              | 44%  |
| Antworten gesamt                                                                                                                                                   | 102                     |     | 21                         |     | 11                            |     | 134             | 102% |
|                                                                                                                                                                    |                         |     |                            |     |                               |     | 0               | 0%   |
| <b>Frage 27: Was sind Ihrer Ansicht nach typische Einschränkungen der Lebensqualität von Patienten, die wegen eines retroperitonealen Sarkoms operiert werden?</b> |                         |     |                            |     |                               |     |                 |      |
| a) Niereninsuffizienz                                                                                                                                              | 13                      | 14% | 8                          | 38% | 1                             | 10% | 22              | 17%  |
| b) Störungen der Nahrungspassage                                                                                                                                   | 33                      | 36% | 7                          | 33% | 2                             | 20% | 42              | 32%  |
| c) Narbenhernien                                                                                                                                                   | 53                      | 58% | 6                          | 29% | 6                             | 60% | 65              | 49%  |
| d) Immobilität                                                                                                                                                     | 8                       | 9%  | 4                          | 19% | 0                             | 0%  | 12              | 9%   |
| e) Chronische Schmerzen                                                                                                                                            | 50                      | 55% | 8                          | 38% | 1                             | 10% | 59              | 45%  |
| f) Sonstiges                                                                                                                                                       | 12                      | 13% | 8                          | 38% | 3                             | 30% | 23              | 17%  |
| Antworten gesamt                                                                                                                                                   | 169                     |     | 41                         |     | 13                            |     | 223             | 169% |
| <b>Frage 28: Wie hoch schätzen Sie die 5-Jahres-Lokalrezidivrate nach Resektion eines primären retroperitonealen Sarkoms ein?</b>                                  |                         |     |                            |     |                               |     |                 |      |
| Freie Eingabe in Prozent, hier in Kategorien zusammengefasst.                                                                                                      |                         |     |                            |     |                               |     |                 |      |
| 1-25%                                                                                                                                                              | 46                      | 45% | 5                          | 24% | 2                             | 18% | 53              | 40%  |
| 26-50%                                                                                                                                                             | 35                      | 34% | 9                          | 43% | 7                             | 64% | 51              | 38%  |
| 51-75%                                                                                                                                                             | 13                      | 13% | 4                          | 19% | 1                             | 9%  | 18              | 13%  |
| 76-100%                                                                                                                                                            | 5                       | 5%  | 1                          | 5%  | 0                             | 0%  | 6               | 4%   |
| keine Angabe                                                                                                                                                       | 3                       | 3%  | 2                          | 10% | 1                             | 9%  | 6               | 4%   |
| Median                                                                                                                                                             | 26%                     |     | 40%                        |     | 31%                           |     |                 |      |
| <b>Frage 29: abschliessender Kommentar zur Umfrage</b>                                                                                                             |                         |     |                            |     |                               |     |                 |      |
